# Supplementary material
Source: Royal Society of Chemistry journal article supplement (doi:10.1039/d6ta01070a)
Supplement: d6ta01070a1.pdf [file d6ta01070a1.pdf]

## Supporting Information

### **Crosslinked, highly-conductive binder unlocks low-temperature silicon anodes for lithium-ion batteries**

Yihong Yao,<sup>a,§</sup> Yaozong Yang,<sup>a,§</sup> Zhijie Jiang,<sup>c,\*</sup> Zhaolin Li,<sup>a</sup> Sihong Du,<sup>c</sup> Jie Wang,<sup>a,b</sup> Ying Luo,<sup>d</sup> Jingying Xie,<sup>d</sup> and Hailei Zhao<sup>a,b,\*</sup>

<sup>a</sup> School of Material Science and Engineering, University of Science and Technology Beijing, Beijing 100083, China

<sup>b</sup> Beijing Municipal Key Laboratory of New Energy Materials and Technologies, Beijing 100083, China

<sup>c</sup> Beijing Xiaomi Mobile Software Co., Ltd. Beijing 100085, China

<sup>d</sup> State Key Laboratory of Space Power-Sources Technology, Shanghai Institute of Space Power-Sources, Shanghai 200245, China

§ These authors contributed equally to this work.

---

\* Corresponding author at: School of Materials Science and Engineering, University of Science and Technology Beijing, Beijing 100083, China.

E-mail address: hlzhao@ustb.edu.cn (H. Zhao).

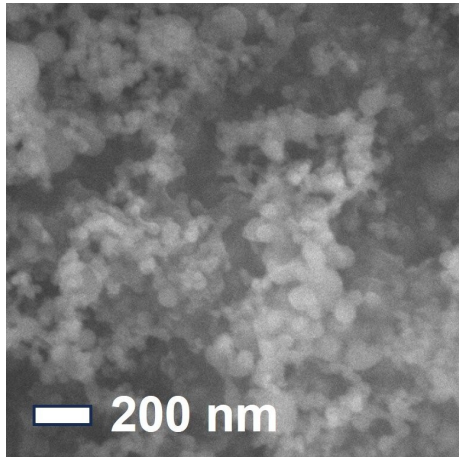

**Figure S1.** SEM image of Si power.

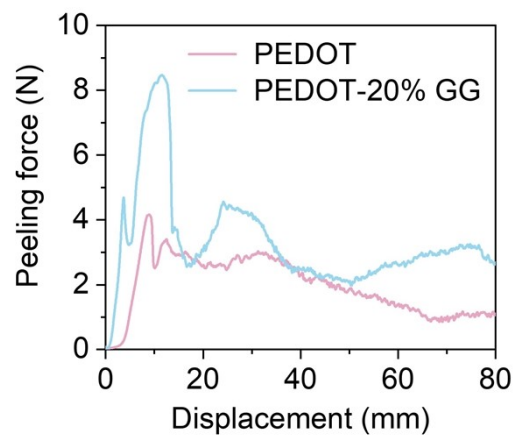

**Figure S2.** 180° peeling tests of PEDOT@Si and PEDOT-20%GG@Si electrodes on Cu foil current collectors.

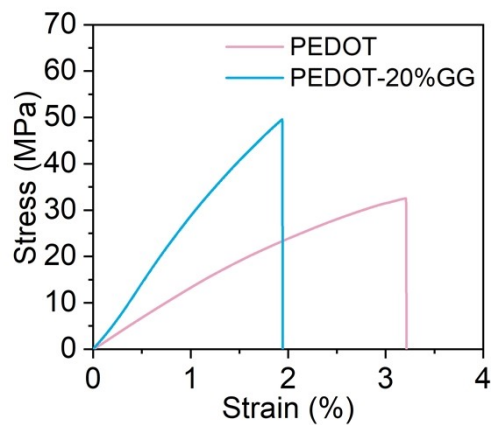

**Figure S3.** Tensile stress-strain curves of studied two binder films PEDOT and PEDOT-20%GG.

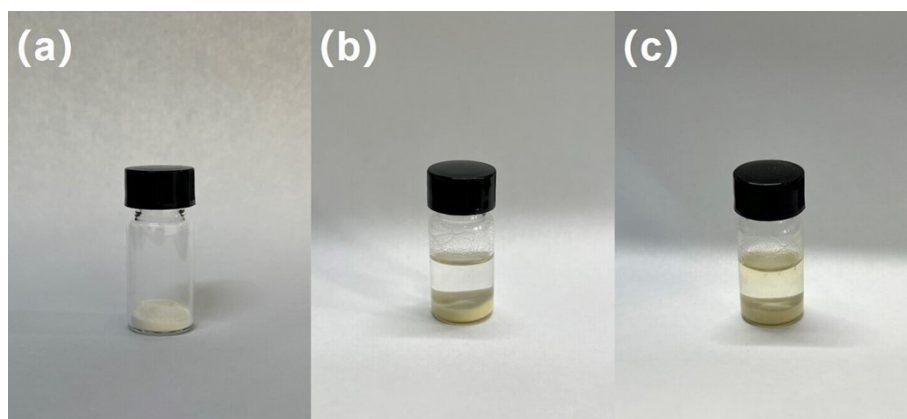

**Figure S4.** Photos of GG (a) and mixture of GG and electrolyte after 0 (b) and 24 h (c).

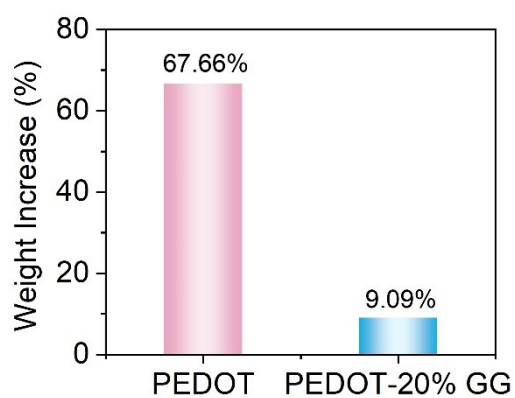

**Figure S5.** Swelling performance test of binders PEDOT and PEDOT-20%GG.

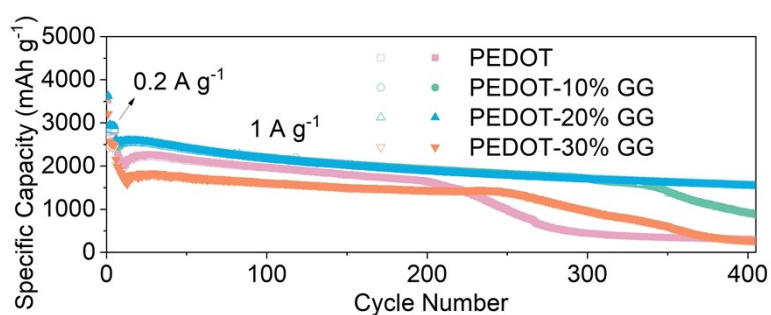

**Figure S6.** Cycling performance of PEDOT@Si, PEDOT-10%GG@Si, PEDOT-20%GG@Si, and PEDOT-30%GG@Si electrodes at a current density of 1 A g<sup>-1</sup>.

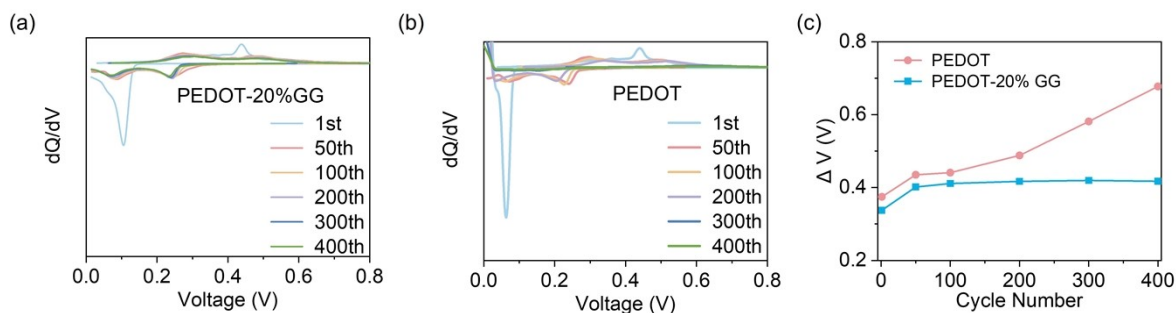

**Figure S7.** Plots of  $dQ/dV$  vs. voltage of electrodes PEDOT-20%GG@Si (a) and PEDOT@Si (b) at different cycles. (c) Voltage difference of electrodes PEDOT-20%GG@Si and PEDOT@Si.

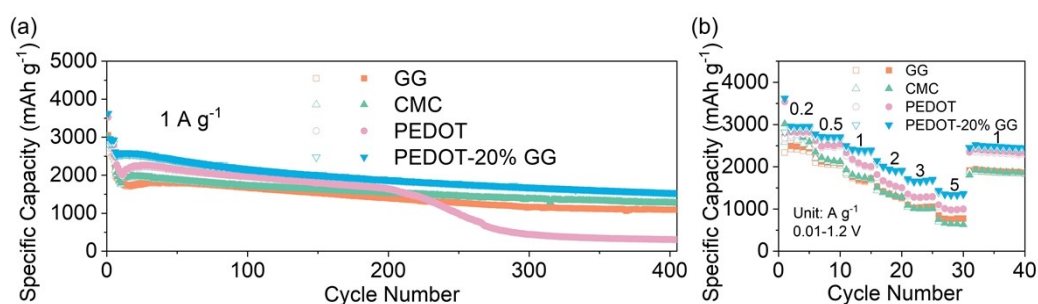

**Figure S8.** (a) Cycling performance of electrodes GG@Si, CMC@Si, PEDOT@Si, PEDOT-20%GG@Si at a current density of  $1 \text{ A g}^{-1}$ . (b) Rate performance of electrodes GG@Si, CMC@Si, PEDOT@Si, and PEDOT-20%GG@Si.

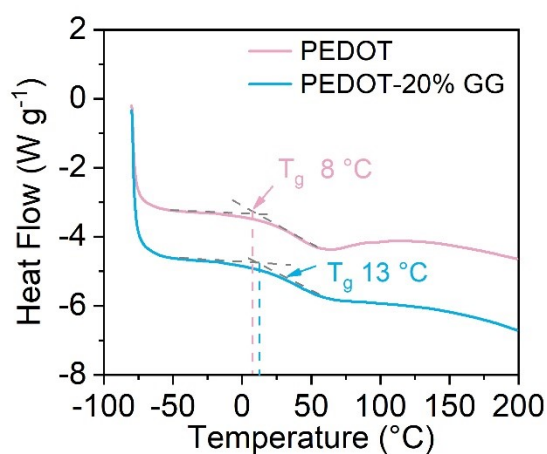

**Figure S9.** DSC curves of two binder films PEDOT and PEDOT-20%GG.

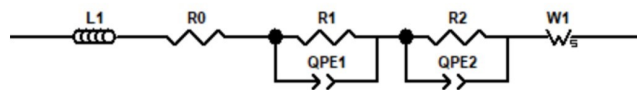

**Figure S10.** Equivalent circuit of Nyquist plot.

**Table S1.** Fitting parameters of EIS results of Si electrode with different binders at different cycles based on the data in Figure 5.

| Sample      | Cycle number | $R_0$ ( $\Omega$ ) | $R_f$ ( $\Omega$ ) | $R_{ct}$ ( $\Omega$ ) |
|-------------|--------------|--------------------|--------------------|-----------------------|
| PEDOT       | 20           | 2.753              | 5.083              | 34.83                 |
|             | 400          | 7.645              | 11.46              | 45.07                 |
| PEDOT-20%GG | 20           | 3.302              | 5.065              | 12.01                 |
|             | 400          | 5.987              | 6.181              | 28.77                 |

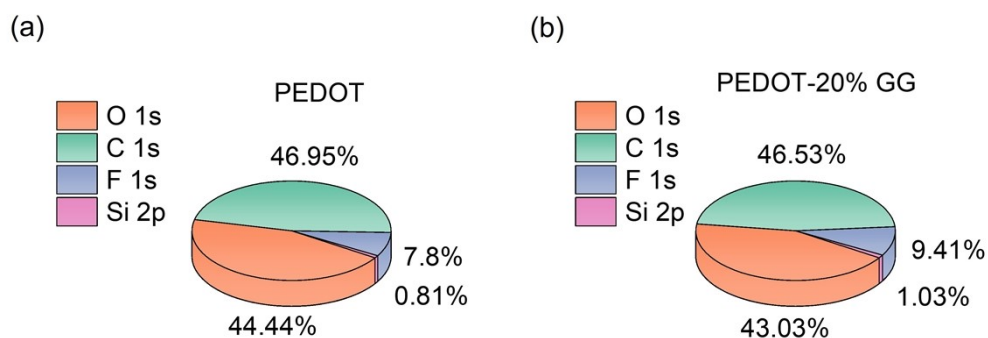

**Figure S11.** Diagram of content of each element in the SEI film of electrodes PEDOT@Si (a) and PEDOT-20%GG@Si (b) respectively, after 50 cycles, according to XPS results.

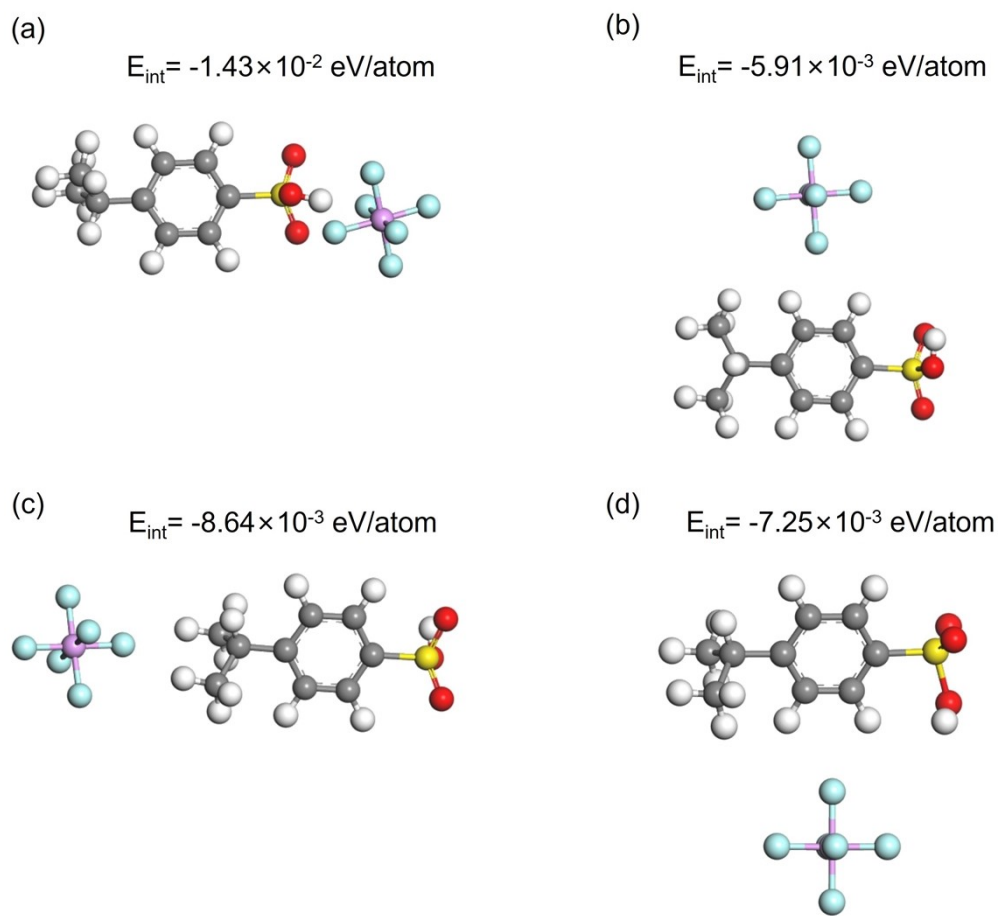

**Figure S12.** Calculation molecular structure and the obtained binding energy between PSS and  $\text{PF}_6^-$ .

(a)  $E_{\text{int}} = -1.65 \times 10^{-2}$  eV/atom

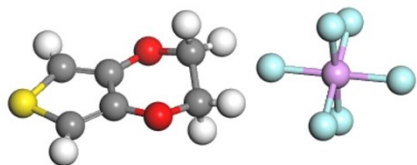

(b)  $E_{\text{int}} = -6.41 \times 10^{-3}$  eV/atom

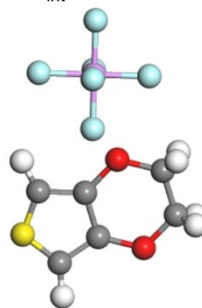

(c)  $E_{\text{int}} = -4.05 \times 10^{-3}$  eV/atom

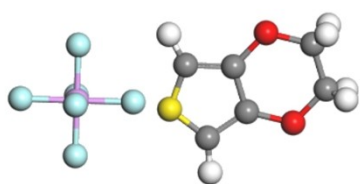

(d)  $E_{\text{int}} = -5.43 \times 10^{-3}$  eV/atom

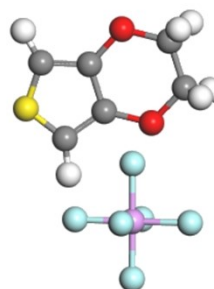

**Figure S13.** Calculation molecular structure and the obtained binding energy between PEDOT and  $\text{PF}_6^-$ .
